# Supplementary material
Source: PubMed Central journal article supplement (PMC5111356)

Supporting Information

**17-Cyclopropylmethyl-3,14 $\beta$ -dihydroxy-4,5 $\alpha$ -epoxy-6 $\beta$ -(4'-pyridylcarboxamido)morphinan (NAP) modulating the mu opioid receptor in a biased fashion**

Yan Zhang,<sup>\*,†</sup> Dwight A. Williams,<sup>†,‡</sup> John M. Streicher,<sup>§</sup> Yunyun Yuan,<sup>†</sup> Saheem A. Zaidi,<sup>†</sup> Amanda Braithwaite,<sup>§</sup> Hamid I. Akbarali,<sup>‡</sup> William L. Dewey,<sup>‡</sup> Dana E. Selley,<sup>‡</sup> Edward J. Bilsky<sup>§</sup>

<sup>†</sup>Department of Medicinal Chemistry, Virginia Commonwealth University, 800 East Leigh Street, Richmond, VA 23298, USA

<sup>‡</sup>Department of Pharmacology and Toxicology, Virginia Commonwealth University, 410 North 12th Street, Richmond, VA 23298, USA

<sup>§</sup>Department of Biomedical Sciences, College of Osteopathic Medicine, University of New England, 11 Hills Beach Road, Biddeford, ME 04005, USA

**Figure 1S.** Ca<sup>2+</sup> flux assay in G<sub>αqi5</sub> transfected hMOR-CHO cells. The results shown are representative of at least three independent experiments. The detection time was extended to 10 min in contrast to 2 min.

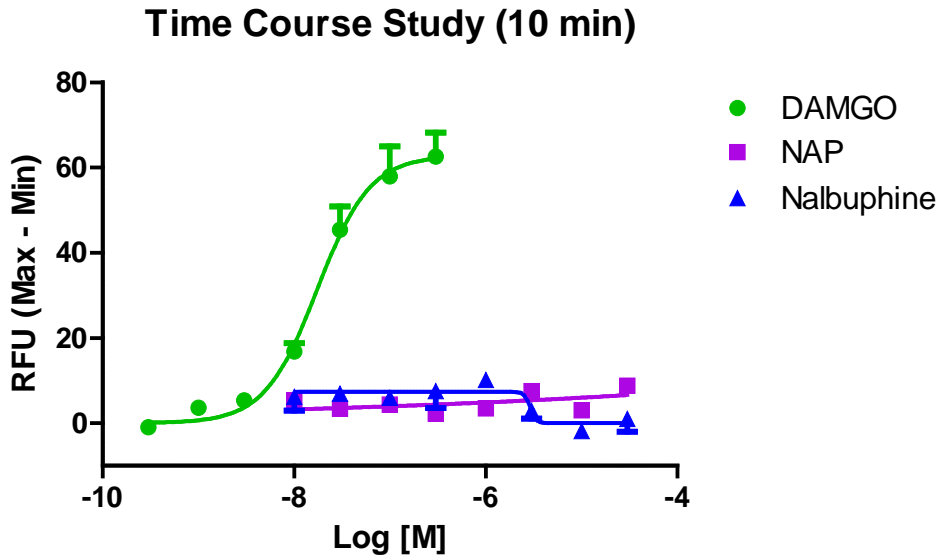

Supplement: NIHMS798647-supplement-SI.pdf [file NIHMS798647-supplement-SI.pdf]
